# Supplementary material
Source: MDPI journal article supplement (https://www.mdpi.com/1424-2818/15/4/547)
Supplement: s1 [file s1]

Table S1. Locations of sampling sites over the eastern (EC) and western (WC) parts of Chukotka.

| Lake (basin)                           | Coordinates             |
|----------------------------------------|-------------------------|
| Kokanlegytgyn<br>(Koluchinskaya, EC)   | 66.27271 N 175.31137 W  |
| Vykvyrkapgytgyn<br>(Koluchinskaya, EC) | 66.528775 N 175.90644 W |
| Ravkergytgyn<br>(Amguema, EC)          | 66.69894 N 179.04753 E  |
| Gytgypylgyn<br>(Pektymel', WC)         | 68.66182 N 176.92318 E  |
| Gytgyl (Palavaam,<br>WC)               | 68.23858 N 176.27533 W  |

Table S2. The amplification mixture and PCR conditions for each gene.

| gene | mixture                                                                                                                                                                                                                                    | conditions                                                     |
|------|--------------------------------------------------------------------------------------------------------------------------------------------------------------------------------------------------------------------------------------------|----------------------------------------------------------------|
| COI  | The 50 $\mu$ L PCRs contained 25 $\mu$ L buffer (BioMaster HS-Taq PCR-Color reaction mix, Biolabmix), 1 $\mu$ L of primer, 5 $\mu$ L of magnesium chloride, 16 $\mu$ L of sterile water and 2 $\mu$ L of total DNA was used as a template. | 1) 5 min at 95 °C                                              |
| cytb |                                                                                                                                                                                                                                            | 2) 35 cycles: 45 s at 90 °C, 30 s at 62 °C, and 1 min at 72 °C |
| ATP6 |                                                                                                                                                                                                                                            | 3) 5 min at 72 °C                                              |
|      |                                                                                                                                                                                                                                            | 1) 5 min at 95 °C                                              |
|      |                                                                                                                                                                                                                                            | 2) 34 cycles: 30 s at 90 °C, 30 s at 48 °C, and 1 min at 72 °C |
|      |                                                                                                                                                                                                                                            | 3) 5 min at 72 °C                                              |

Table S3. List of haplotypes which were taken from GeneBank. South Alaska (SA); central part of North America (NA). The bold highlighted haplotypes were used for network; all haplotypes were used to estimate the degrees of genetic divergence between groups

| Region                       | Locality                        | Coordinates               | Haplotype Id                                                |
|------------------------------|---------------------------------|---------------------------|-------------------------------------------------------------|
| Cytochrome oxidase subunit 1 |                                 |                           |                                                             |
| SA                           | Kenai peninsula<br>unnamed lake | 60.68208 N<br>152.39392 W | <b>KT630728</b>                                             |
| SA                           | Lake Clark                      | 60.10990 N<br>154.57273 W | <b>KT630729</b>                                             |
| SA                           | Kenai peninsula<br>unnamed Lake | 60.37173 N<br>152.94019 W | <b>KT630730</b>                                             |
| SA                           | Becharof Lake                   | 57.94588 N<br>156.33206 W | <b>MT577182</b> , MT577183, MT577184,<br>MT577185, MT577186 |
| NA                           | Yukon River                     | Undefined                 | EU525103, EU525104                                          |

|                           |                                 |                            |                                                                                                                                                                      |
|---------------------------|---------------------------------|----------------------------|----------------------------------------------------------------------------------------------------------------------------------------------------------------------|
| NA                        | Winnage Lake                    | 49.73650 N<br>93.71224 W   | KX145436, KX145354, KX145121, <b>KX145332</b> , KF536951, KF536943, KF536942, <b>KF536941</b> , KF536940, KF536949, KF536948, KF536947, KF536946, KF536945, KF536944 |
| NA                        | Williston Lake                  | 56.02798 N<br>123.95535 W  | <b>MT577180</b> , MT577179                                                                                                                                           |
| NA                        | Chapman Lake                    | 54.93124 N<br>126.67560 W  | <b>JX960931</b>                                                                                                                                                      |
| NA                        | Lake Superior                   | 47.92979 N<br>87.34351 W   | <b>JX960930</b>                                                                                                                                                      |
| NA                        | Owen Lake                       | 55.17713 N<br>124.41027 W  | <b>MT577181</b>                                                                                                                                                      |
| Cytochrome B              |                                 |                            |                                                                                                                                                                      |
| SA                        | Kenai peninsula<br>unnamed lake | 60.37173 N<br>152.94019 W  | <b>KT630746</b>                                                                                                                                                      |
| SA                        | Lake Clark                      | 60.10990 N<br>154.57273 W  | <b>KT630747</b>                                                                                                                                                      |
| SA                        | Chakachatna<br>River            | 61.20948 N,<br>152.54129 W | <b>KT630748</b>                                                                                                                                                      |
| NA                        | Lake Superior                   | 47.92979 N<br>87.34351 W   | <b>JX960823</b>                                                                                                                                                      |
| NA                        | Chapman Lake                    | 54.93124 N<br>126.67560 W  | <b>JX960824</b>                                                                                                                                                      |
| ATP synthase F0 subunit 6 |                                 |                            |                                                                                                                                                                      |
| SA                        | Aishihik Lake                   | 61.39204 N<br>137.09060 W  | HQ616456                                                                                                                                                             |
| SA                        | Black Lake                      | 56.45807 N<br>158.98839 W  | HQ616458, <b>HQ616459</b> , <b>HQ616460</b>                                                                                                                          |
| SA                        | Chignik Lake                    | 56.27780 N<br>158.87029 W  | <b>HQ616459</b> , <b>HQ616460</b>                                                                                                                                    |
| SA                        | Ugashik Lake                    | 57.54546 N<br>156.96034 W  | HQ616457, <b>HQ616460</b> , <b>HQ616461</b>                                                                                                                          |
| NA                        | Arrow Lake                      | 45.10959 N<br>117.39406 W  | HQ616441, <b>HQ616445</b> , <b>HQ616451</b>                                                                                                                          |
| NA                        | Flathead Lake                   | 47.83031 N<br>114.11658 W  | HQ616440, HQ616441                                                                                                                                                   |
| NA                        | Kootenay Lake                   | 49.53404 N<br>116.81264 W  | <b>HQ616451</b> , HQ616454                                                                                                                                           |
| NA                        | Cluculz Lake                    | 53.88244 N<br>123.53171 W  | <b>HQ616451</b> , HQ616452                                                                                                                                           |
| NA                        | Jack of Clubs                   | 53.08959 N<br>121.59338 W  | <b>HQ616451</b>                                                                                                                                                      |
| NA                        | McCleese Lake                   | 52.41367 N<br>122.30035 W  | <b>HQ616451</b>                                                                                                                                                      |
| NA                        | Arctic Lake                     | 54.42061 N<br>121.67234 W  | <b>HQ616451</b>                                                                                                                                                      |
| NA                        | Aiken Lake                      | 56.42887 N<br>125.75818 W  | HQ616441, <b>HQ616451</b>                                                                                                                                            |

|    |                     |                           |                                               |
|----|---------------------|---------------------------|-----------------------------------------------|
| NA | Dina Lake           | 55.52970 N<br>123.30663 W | <b>HQ616451</b>                               |
| NA | Lower Manson Lake   | 55.63502 N<br>124.36323 W | HQ616441, <b>HQ616451</b>                     |
| NA | Peace Reach         | 56.10778 N<br>122.68261 W | HQ616449, <b>HQ616451</b> , HQ616452          |
| NA | Upper Manson Lake   | 55.65447 N<br>124.38704 W | HQ616441, <b>HQ616451</b>                     |
| NA | Chuchi Lake         | 55.17713 N<br>124.41027 W | HQ616439, HQ616441, HQ616444                  |
| NA | Quentin Lake        | 57.84032 N<br>125.29102 W | HQ616450, <b>HQ616451</b>                     |
| NA | Kwadacha River      | 57.54228 N<br>125.56322 W | HQ616450, <b>HQ616451</b>                     |
| NA | Lower Tacheeda Lake | 54.71764 N<br>122.51711 W | HQ616436, HQ616437, HQ616438, HQ616442        |
| NA | Upper Tacheeda Lake | 54.69594 N<br>122.55325 W | HQ616441                                      |
| NA | Monkman Lake        | 54.60777 N<br>121.19400 W | HQ616448, HQ616441                            |
| NA | Six Mile Bay        | 55.23457 N<br>123.15084 W | HQ616449, <b>HQ616451</b> , HQ616453          |
| NA | Tutizzi Lake        | 56.30968 N<br>125.67450 W | HQ616441, HQ616446, HQ616447, <b>HQ616451</b> |
| NA | Weissener Lake      | 57.74129 N<br>125.74449 W | HQ616441, HQ616443                            |
| NA | Chapman Lake        | 54.71718 N<br>127.03966 W | <b>HQ616445</b> , HQ616441, <b>HQ616451</b>   |
| NA | Owen Lake           | 55.17713 N<br>124.41027 W | <b>HQ616451</b>                               |
| NA | Tyhee Lake          | 57.84032 N<br>125.29102 W | <b>HQ616445</b> , <b>HQ616451</b>             |
| NA | Lake Superior       | 47.92979 N<br>87.34351 W  | <b>HQ616455</b>                               |
| NA | Chester Morse Lake  | 47.39431 N<br>121.71165 W | HQ616441                                      |

Table S4. List of accession numbers of the three mtDNA fragments across Chukotkan populations of *Prosopium coulterii* deposited to GenBank.

| Haplotype | GenBank Accession Number |
|-----------|--------------------------|
| 1COI      | OQ379951                 |
| 2COI      | OQ379952                 |
| 3COI      | OQ379953                 |
| 4COI      | OQ379954                 |
| 1C        | OQ405329                 |
| 2C        | OQ405330                 |

|     |          |
|-----|----------|
| 3C  | OQ405331 |
| 4C  | OQ405332 |
| 5C  | OQ405333 |
| 6C  | OQ405334 |
| 7C  | OQ405335 |
| 8C  | OQ405336 |
| 9C  | OQ405337 |
| 10C | OQ405338 |
| 11C | OQ405339 |
| 12C | OQ405340 |
| 13C | OQ405341 |
| 1A  | OQ405342 |
| 2A  | OQ405343 |
| 3A  | OQ405344 |
| 4A  | OQ405345 |
| 5A  | OQ405346 |
| 6A  | OQ405347 |
| 7A  | OQ405348 |

Table S5. Nucleotide and haplotype diversity indices of COI – CytB – ATP6 sequences of the *Prosopium coulterii* populations from Western and Eastern Chukotka.

|                  | Nucleotide diversity $\pi \pm SD$ |                          |                          | Haplotype diversity. $Hd \pm SD$ |                      |                      |
|------------------|-----------------------------------|--------------------------|--------------------------|----------------------------------|----------------------|----------------------|
|                  | COI                               | CytB                     | Atp6                     | COI                              | CytB                 | Atp6                 |
| Western Chukotka | 0.00472 $\pm$<br>0.00124          | 0.00190 $\pm$<br>0.00032 | 0.00275 $\pm$<br>0.00057 | 0.639 $\pm$<br>0.126             | 0.909 $\pm$<br>0.066 | 0.889 $\pm$<br>0.075 |
| Eastern Chukotka | 0.00149 $\pm$<br>0.00112          | 0.00154 $\pm$<br>0.00025 | 0.00192 $\pm$<br>0.00028 | 0.222 $\pm$<br>0.166             | 0.901 $\pm$<br>0.058 | 0.756 $\pm$<br>0.070 |

Table S6. List of ATP synthase F0 subunit 6 haplotypes which were taken from GeneBank. Southern Alaska (SA) – clade 1; central part of North America (NA)- clade 2 according to Witt et. al. (2011) [17].

| Region | Locality      | Coordinates               | Haplotype GeneBank Id           | Haplotype number |
|--------|---------------|---------------------------|---------------------------------|------------------|
| SA     | Aishihik Lake | 61.39204 N<br>137.09060 W | HQ616456                        | H21              |
| SA     | Black Lake    | 56.45807 N<br>158.98839 W | HQ616458, HQ616459,<br>HQ616460 | H23, H24, H25    |



|    |                     |                           |                                                                                |                                      |
|----|---------------------|---------------------------|--------------------------------------------------------------------------------|--------------------------------------|
| SA | Chignik Lake        | 56.27780 N<br>158.87029 W | HQ616459, HQ616460,<br>JX033600, JX033601,<br>JX033602, JX033600,<br>JX033604. | H24, H25, H27, H28,<br>H29, H30, H31 |
| SA | Ugashik Lake        | 57.54546 N<br>156.96034 W | HQ616457, HQ616460,<br>HQ616461                                                | H22, H25, H26                        |
| NA | Arrow Lake          | 45.10959 N<br>117.39406 W | HQ616441, HQ616445,<br>HQ616451                                                | H6, H10, H16                         |
| NA | Flathead Lake       | 47.83031 N<br>114.11658 W | HQ616440, HQ616441                                                             | H5, H6                               |
| NA | Kootenay Lake       | 49.53404 N<br>116.81264 W | HQ616451, HQ616454                                                             | H16, H19                             |
| NA | Cluculz Lake        | 53.88244 N<br>123.53171 W | HQ616451, HQ616452                                                             | H16, H17                             |
| NA | Jack of Clubs       | 53.08959 N<br>121.59338 W | HQ616451                                                                       | H16                                  |
| NA | McCleese Lake       | 52.41367 N<br>122.30035 W | HQ616451                                                                       | H16                                  |
| NA | Arctic Lake         | 54.42061 N<br>121.67234 W | HQ616451                                                                       | H16                                  |
| NA | Aiken Lake          | 56.42887 N<br>125.75818 W | HQ616441, HQ616451                                                             | H6, H16                              |
| NA | Dina Lake           | 55.52970 N<br>123.30663 W | HQ616451                                                                       | H16,                                 |
| NA | Lower Manson Lake   | 55.63502 N<br>124.36323 W | HQ616441, HQ616451                                                             | H6, H16                              |
| NA | Peace Reach         | 56.10778 N<br>122.68261 W | HQ616449, HQ616451,<br>HQ616452                                                | H14, H16, H17                        |
| NA | Upper Manson Lake   | 55.65447 N<br>124.38704 W | HQ616441, HQ616451                                                             | H6, H16                              |
| NA | Chuchi Lake         | 55.17713 N<br>124.41027 W | HQ616439, HQ616441,<br>HQ616444                                                | H4, H6, H9                           |
| NA | Quentin Lake        | 57.84032 N<br>125.29102 W | HQ616450, HQ616451                                                             | H15, H16                             |
| NA | Kwadacha River      | 57.54228 N<br>125.56322 W | HQ616450, HQ616451                                                             | H15, H16                             |
| NA | Lower Tacheeda Lake | 54.71764 N<br>122.51711 W | HQ616436, HQ616437,<br>HQ616438, HQ616442                                      | H1, H2, H3, H7                       |
| NA | Upper Tacheeda Lake | 54.69594 N<br>122.55325 W | HQ616441                                                                       | H6                                   |
| NA | Monkman Lake        | 54.60777 N<br>121.19400 W | HQ616448, HQ616441                                                             | H6, H13                              |
| NA | Six Mile Bay        | 55.23457 N<br>123.15084 W | HQ61649,<br>HQ61651,<br>HQ61653                                                | H14, H16, H18                        |
| NA | Tutizzi Lake        | 56.30968 N<br>125.67450 W | HQ616441, HQ616446,<br>HQ616447, HQ616451                                      | H6, H11, H12, H16                    |

|    |                    |                           |                                 |              |
|----|--------------------|---------------------------|---------------------------------|--------------|
| NA | Weissener Lake     | 57.74129 N<br>125.74449 W | HQ616441, HQ616443              | H6, H8       |
| NA | Chapman Lake       | 54.71718 N<br>127.03966 W | HQ616445, HQ616441,<br>HQ616451 | H6, H10, H16 |
| NA | Owen Lake          | 55.17713 N<br>124.41027 W | HQ616451                        | H16          |
| NA | Tyhee Lake         | 57.84032 N<br>125.29102 W | HQ616445, HQ616451              | H10, H16     |
| NA | Lake Superior      | 47.92979 N<br>87.34351 W  | HQ616455                        | H20          |
| NA | Chester Morse Lake | 47.39431 N<br>121.71165 W | HQ616441                        | H6           |

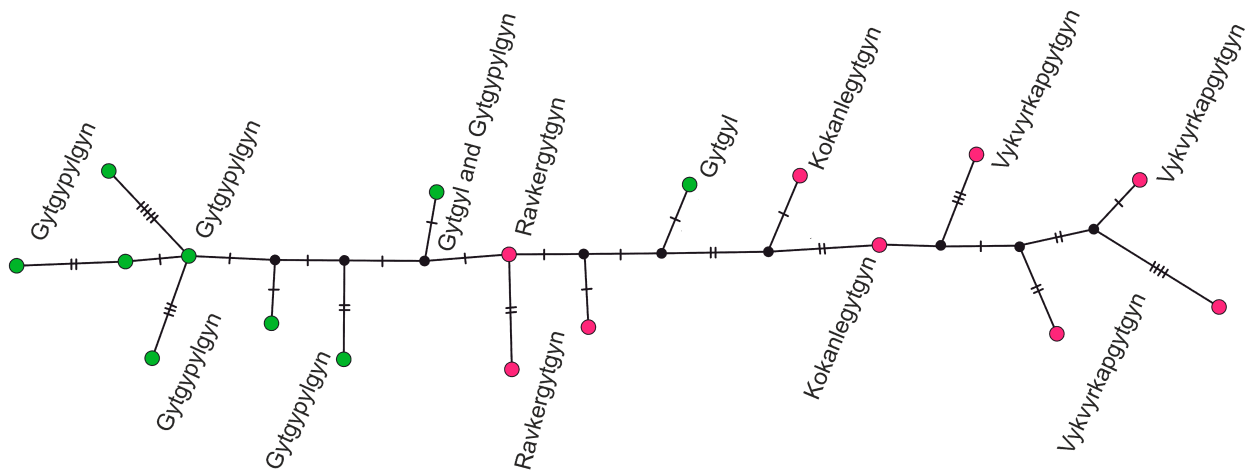

Figure S1. Statistical parsimony network for the combined COI-CytB-ATP6 sequences of the *Prosopium coulterii* populations from Chukotka. Colours indicate different geographical clusters: green is western Chukotka, red is eastern Chukotka.

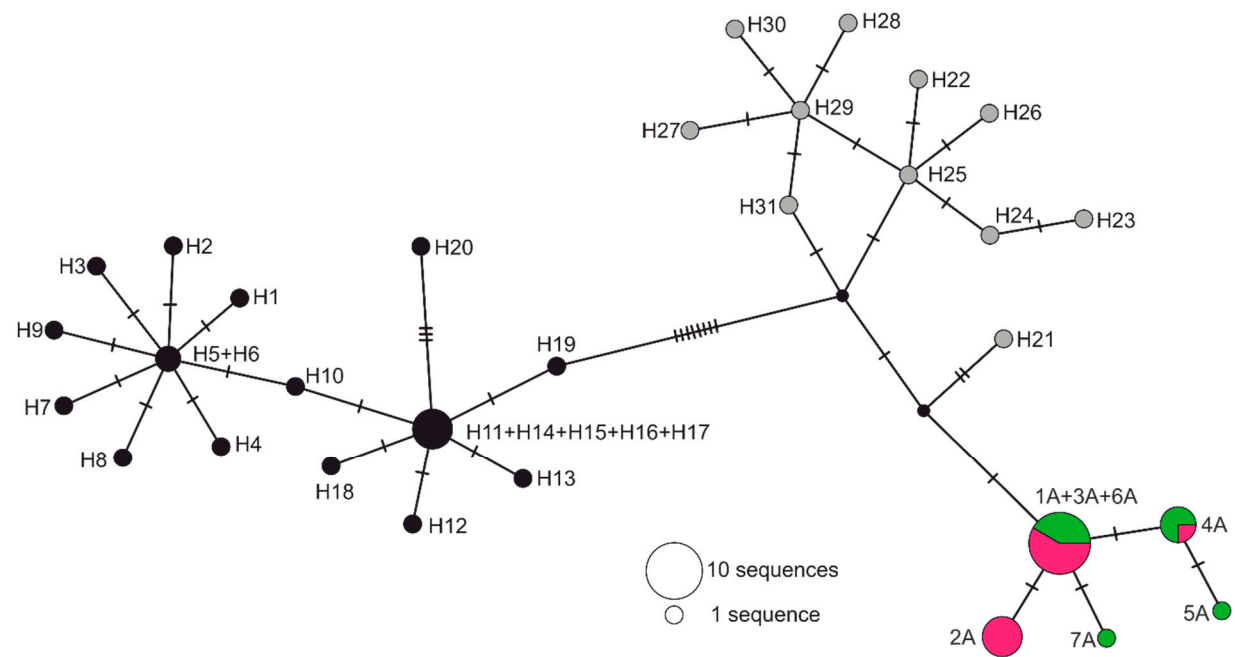

Figure S2. Statistical parsimony network for 500bp mtDNA ATP6 gene fragment of the *Prosopium coulterii* populations from four regions. Colors indicate different geographical clusters: western Chukotka (WC), red is eastern Chukotka (EC), grey is southern Alaska (SA) and black is continental North America (NA). The circle sizes correspond to the number of sequences. Haplotype names from SA and NA regions were taken from the original papers (H1-H26 from Whitt et al. (2011) [17]; H27-H31 from Gowell et al. (2012) [31]). All sequences were trimmed and aligned based on shortest sequences (H27-H31). Because of trimming to 500 bp sequence length some of known 650bp-haplotypes from our data and Genbank stacked together, their names given through «+» symbol.

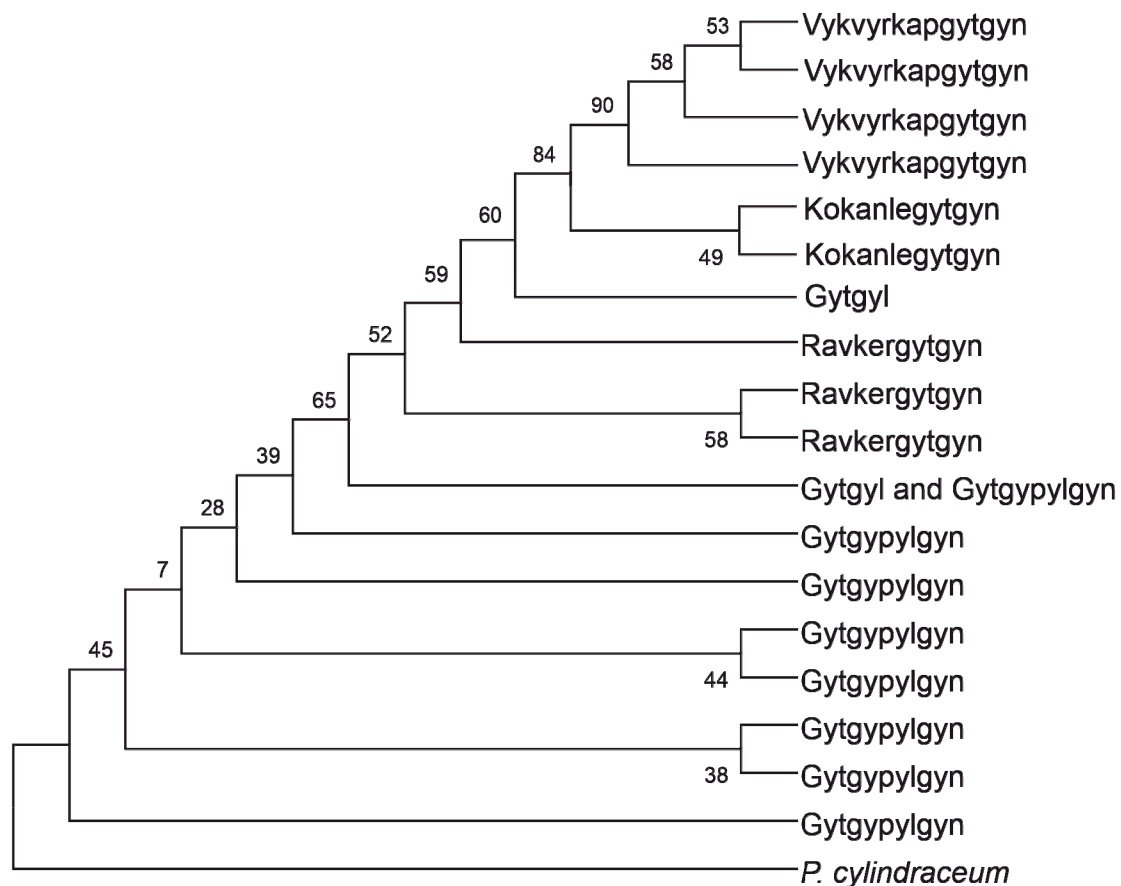

Figure S3. The ML-tree with the highest log likelihood (-4249,49) and Gamma distribution = 0.2366 employed for the combined COI-CytB-ATP6 sequences of the *Prosopium coulterii* populations from two Chukotkan regions. The tree is drawn using Bootstrap consensus; the percentage of trees in which the associated haplotypes clustered together is shown next to the branches.

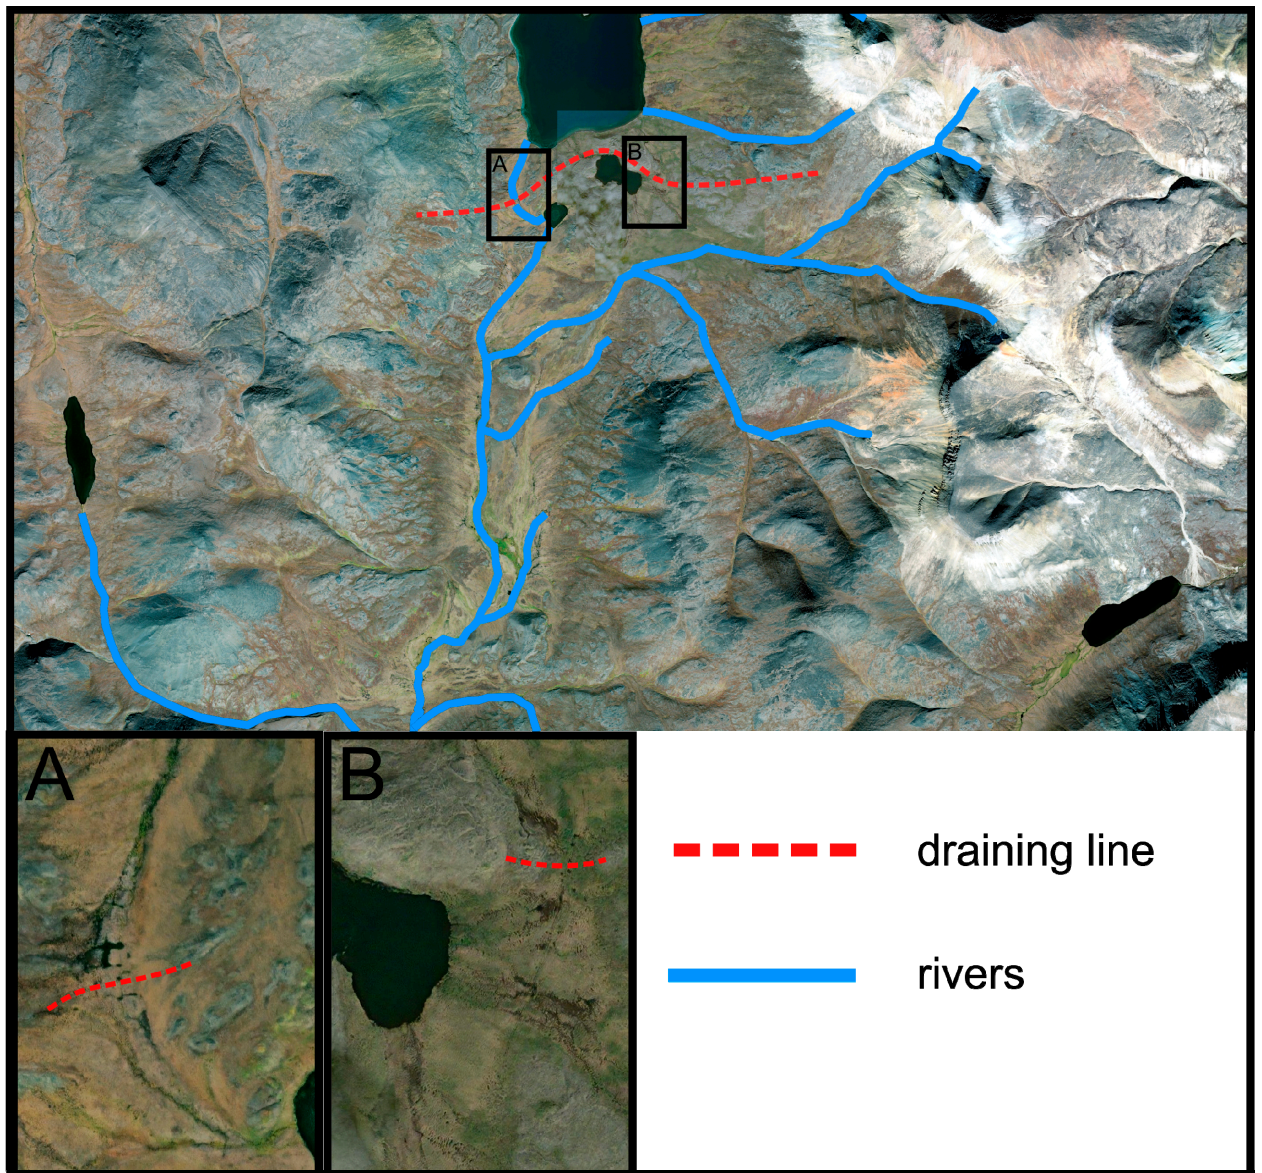

Figure S4. Potential temporary waterway connections at N68°23'11.3688"; E178°24'15.7397" near Lake Eler'gytgyn.
